# Supplementary material for: Spherical spindle shape promotes perpendicular cortical orientation by preventing isometric cortical pulling on both spindle poles during C. elegans female meiosis
Source: Oxford University Press journal article supplement (doi:10.1242/dev.178863), 2019-01-01
Supplement: dev178863supp.pdf [file dev178863supp.pdf]

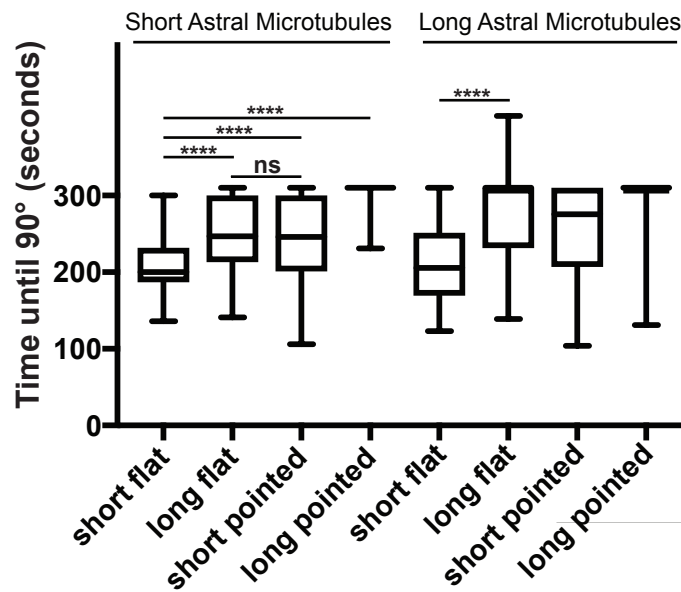

Figure S1. Both short axial ratio and flat spindle poles decrease the time required to rotate to 90° in Cytosim simulations. Spindles that did not rotate to 90° during the 300 sec simulation were assigned a time of 310 sec. n=100 simulations for each of 8 conditions. Boxes extend from the 25th to the 75th percentile. \*\*\*\* indicates  $p < .0001$  by ANOVA.

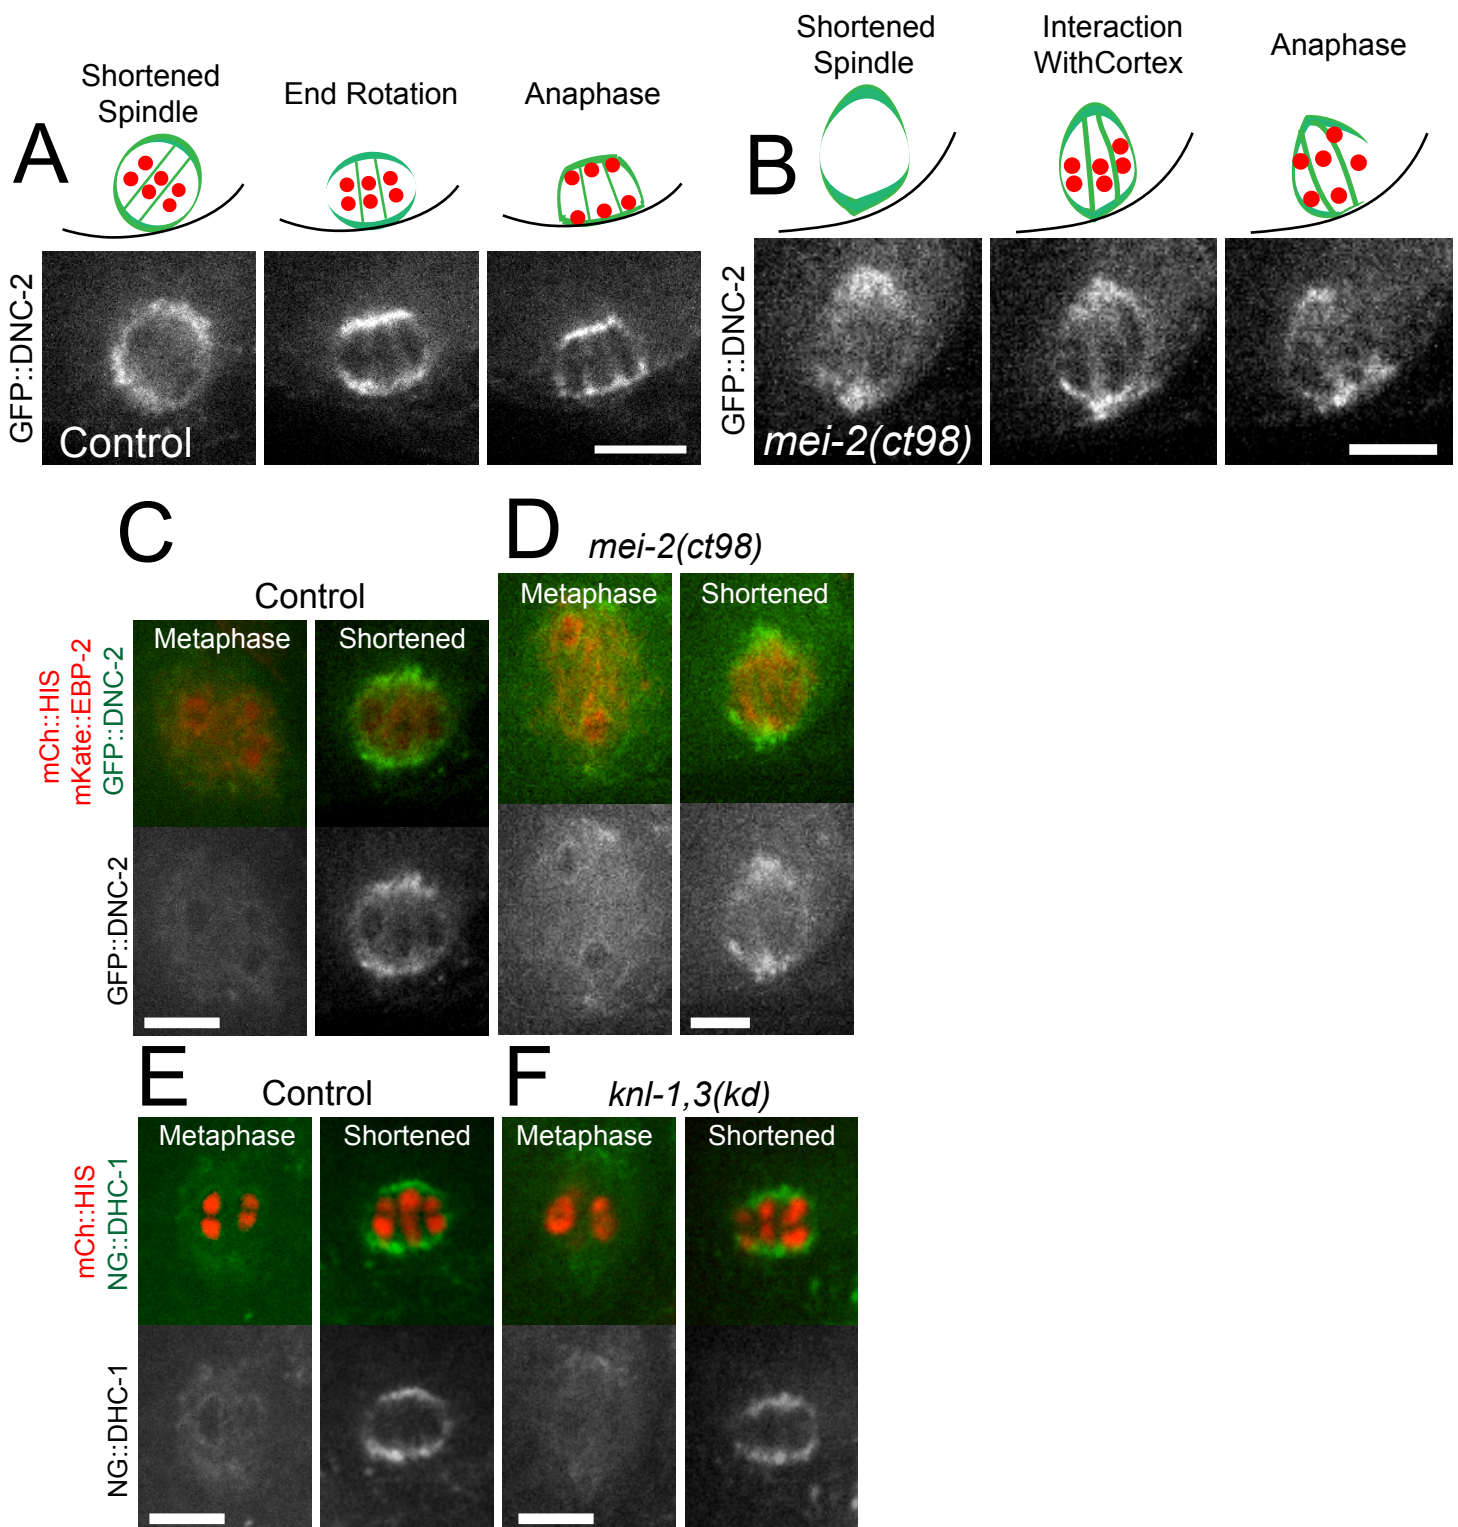

Figure S2. Endogenously tagged dynein regulators label spindle poles in control, *mei-2(ct98)* and *knl-1,3(kd)* embryos. (A-D). GFP::DNC-2 (p50 dynamitin) is present at spindle poles in control (A, C) and *mei-2(ct98)* (B, D) embryos. (E-F). mNeonGree::DHC-1 is present at spindle poles of control (E) and *knl-1,3(kd)* spindles (F). Bars = 5  $\mu$ m.

Table S1. *C. elegans* strains.

FM125: *ruls57[pie-1p::GFP::tubulin + unc-119(+)]V*; *itIs37[pie-1p::mCherry:H2B::pie-1 3'UTR + unc-119(+)] IV*.

FM13: *mei-2(ct98) I*; *ruls57[pie-1p::GFP::tubulin + unc-119(+)]V*; *itIs37[pie-1p::mCherry:H2B::pie-1 3'UTR + unc-119(+)] IV*.

FM562: *lin-5(he244[egfp::lin-5] II*; *itIs37[pie-1p::mCherry:H2B::pie-1 3'UTR + unc-119(+)] IV*.

FM582: *mei-2(ct98) I*; *lin-5(he244[egfp::lin-5] II*; *itIs37[pie-1p::mCherry:H2B::pie-1 3'UTR + unc-119(+)] IV*.

FM485: *lin-5(he244[egfp::lin-5] II*; *duSi10[mex-5p::mCherry::H2B operon linker mKate2::PH inserted in K03H6.5] IV*.

FM583: *mei-2(ct98) I*; *lin-5(he244[egfp::lin-5] II*; *duSi10[mex-5p::mCherry::H2B operon linker mKate2::PH inserted in K03H6.5] IV*.

FM461: *cpIs54[mex-5p::mKate::PLC(delta)PH(A735T)::tbb-2 3'UTR + unc-119(+)] II*; *itIs37[pie-1p::mCherry:H2B::pie-1 3'UTR + unc-119(+)] IV*; *ruls57[pie-1p::GFP::tubulin + unc-119(+)] V*.

EU1561: *orls17 [dhc-1::GFP::DHC-1, unc-119(+)]*; *itls37 [unc-119(+) pie-1::mCherry::H2B]* IV.

FM460: *prtSi122[pRG629; mex-5p::ebp-2::mKate2::tbb-2 3'UTR + unc-119(+)] II*; *dnc-2[prt42(N-terminal 3XFLAG::GFP)] III*; *itls37[pie-1p::mCherry:H2B::pie-1 3'UTR + unc-119(+)] IV*.

FM462: *mei-2(ct98) I*; *prtSi122[pRG629; mex-5p::ebp-2::mKate2::tbb-2 3'UTR + unc-119(+)] II*; *dnc-2[prt42(N-terminal 3XFLAG::GFP)] III*; *itls37[pie-1p::mCherry:H2B::pie-1 3'UTR + unc-119(+)] IV*.

HR399: *unc116(f130) unc-36(e251) III*

FM568: *lin-5(cp288[lin-5::mNG-C1^3xFlag]) II*; *knl-1(lt53[knl-1::GFP::tev::loxP::3xFlag])) III*; *itls37 [pie-1p::mCherry::H2B::pie-1 3'UTR + unc-119(+)] IV*; *knl-3 (lt46 [GFP::knl-3]) V*

FM593: *dhc-1(cp268[dhc::mNG-C1^3xFlag]) I*; *knl-1(lt53[knl-1::GFP::tev::loxP::3xFlag])) III*; *itls37 [pie-1p::mCherry::H2B::pie-1 3'UTR + unc-119(+)] IV*; *knl-3 (lt46 [GFP::knl-3]) V*

FM553: *cpls103*[ *Psun-1*>*TIR1-C1::F2A::mTagBFP2-C1::NLS* + *SEC* ] II; *knl-1*(*du5* [*KNL-1::AID*]) III; *itls37* [*pie-1p::mCherry::H2B::pie-1* 3'UTR + *unc-119(+)*] IV; *ruls57* [*pie-1p::GFP::tubulin* + *unc-119(+)*] V; *knl-3*(*du2* [*AID::KNL-3*]) V

FM554: *ASPM-1*(*or1935* [*GFP::ASPM*]) I; *cpls103*[ *Psun-1*>*TIR1-C1::F2A::mTagBFP2-C1::NLS* + *SEC* ] II; *knl-1*(*du5* [*KNL-1::AID*]) III; *itls37* [*pie-1p::mCherry::H2B::pie-1* 3'UTR + *unc-119(+)*] IV; *knl-3*(*du2* [*AID::KNL-3*]) V

FM594: *dhc-1*(*cp268*[*dhc::mNG-C1^3xFlag*]) I; *itls37* [*pie-1p::mCherry::H2B::pie-1* 3'UTR + *unc-119(+)*] IV

FM595: *lin-5*(*cp288*[*lin-5::mNG-C1^3xFlag*]) II; *itls37* [*pie-1p::mCherry::H2B::pie-1* 3'UTR + *unc-119(+)*] IV

## Supplementary materials and methods

## Cytosim code

```

%%%%%%%%%%%%%%%%%%%%%%%%%%%%%%%%%%%%%%%%%%%%%%%%%%%%%%%%%%%%%%%%%%%%%%%%%% SIM %%%%%%%%%%%%%%%%%%%%%%%%%%%%%%%%%%%%%%%%%%%%%%%%%%%%%%%%%%%%%%%%%%%%%%%%%%%
set simul INVIVO          %Parameters that describe the simulation physics
{
    time_step = 0.001      %The time interval, in seconds, that passes between each timepoint calculated by the Langevin
    steric = 1, 100        %Sets whether fibers and solids can sterically repel each other. 1 is a Boolean that sets steric to
                           %TRUE; 100 is the energy cost of violating sterics
    viscosity = 1          % $\mu\text{m}^2/\text{s}$ ; viscosity of the cytoplasm in an oocyte (Daniels et al., 2006)
    tolerance = 0.01       %Describes the precision of object placement calculations (smaller is more precise)
    kT = 0.0042            %pN. $\mu\text{m}$ ; thermal energy of the Brownian system, set for 24C
}

%%%%%%%%%%%%%%%%%%%%%%%%%%%%%%%%%%%%%%%%%%%%%%%%%%%%%%%%%%%%%%%%%%%%%%%%%% SPACE %%%%%%%%%%%%%%%%%%%%%%%%%%%%%%%%%%%%%%%%%%%%%%%%%%%%%%%%%%%%%%%%%%%%%%%%%%%
set space cell            %Parameters that describe the simulation space
{
    geometry = ( capsule 5 15 ) % $\mu\text{m}$ ; defines the half-lengths of the x and y axes of a capsule object
}

%%%%%%%%%%%%%%%%%%%%%%%%%%%%%%%%%%%%%%%%%%%%%%%%%%%%%%%%%%%%%%%%%%%%%%%%%% FIBERS %%%%%%%%%%%%%%%%%%%%%%%%%%%%%%%%%%%%%%%%%%%%%%%%%%%%%%%%%%%%%%%%%%%%%%%%%%%
set fiber microtubule
{
    rigidity = 20           %pN. $\mu\text{m}^2$ ; related to persistence length (Gittes et al., 1993)
    segmentation = 0.5      % $\mu\text{m}$ ; defines the spacing between calculated points on a fiber
    confine = inside, 100    %Sets confinement of fibers to space; number sets energy cost of violating confinement
    steric = 1, 0.05        %Turns sterics on for this fiber; second number is in  $\mu\text{m}$  and defines repulsion radius
    activity = dynamic       %Enables fiber dynamics (growth, shrinkage)
    unit_length = 0.01       % $\mu\text{m}$ ; defines minimal length of a "monomer" for fiber growth (must be  $\leq$  growing_speed)
    growing_speed = 0.08     % $\mu\text{m}/\text{s}$ ; defines growth rate of fiber dynamic end
    shrinking_speed = -0.2   % $\mu\text{m}/\text{s}$ ; defines shrinking rate of fiber dynamic end
    hydrolysis_rate = 0.8, 2 % $\text{s}^{-1}$ ; frequency of fiber switching to shrinkage on dynamic end
    rescue_rate = 0.01       % $\text{s}^{-1}$ ; frequency of fiber switching to growth on dynamic end
    growing_force = 1        %pN; characteristic force for polymer assembly
    binding_key = 1          %Numeric designator that defines which hands and couples can interact/bind
}

set fiber microtubule2
{
    rigidity = 20           %pN. $\mu\text{m}^2$ ; related to persistence length (Gittes et al., 1993)
    segmentation = 1        % $\mu\text{m}$ ; defines the spacing between calculated points on a fiber
    confine = inside, 100    %Sets confinement of fibers to space; number sets energy cost of violating confinement
    binding_key = 2         %Numeric designator that defines which hands and couples can interact/bind
}

%%%%%%%%%%%%%%%%%%%%%%%%%%%%%%%%%%%%%%%%%%%%%%%%%%%%%%%%%%%%%%%%%%%%%%%%%% HANDS %%%%%%%%%%%%%%%%%%%%%%%%%%%%%%%%%%%%%%%%%%%%%%%%%%%%%%%%%%%%%%%%%%%%%%%%%%%
set hand nucleator
{
    unbinding_rate = 0       % $\text{s}^{-1}$ ; frequency of the hand letting go of a fiber if bound
    unbinding_force = 5      %pN; force descriptor for the Kramer's force-dependent unbinding of the hand
    activity = nucleate       %Sets activity of this hand to generate fibers
    nucleate = 1, microtubule2, ( fiber_length= 0.2 )
    %Defines that this hand will generate a single fiber of type "microtubule2" with an initial length of 0.2  $\mu\text{m}$ .
    display = ( size=2; color= green; ) %Sets display parameters for visualization
}

set hand concrete
{
    binding_rate = 6         % $\text{s}^{-1}$ ; frequency of the hand binding a nearby fiber
    binding_range = 0.05     % $\mu\text{m}$ ; defines minimal distance for hand to be able to bind a fiber
    unbinding_rate = 0       % $\text{s}^{-1}$ ; frequency of the hand letting go of a fiber if bound
    binding_key = 2         %Numeric designator that defines which hands and couples can interact/bind
}

```

```

display = ( size=2; color= purple; )    %Sets display parameters for visualization
}

set hand nucleator2
{
    unbinding_rate = 0                %s-1; frequency of the hand letting go of a fiber if bound
    unbinding_force = 3                %pN; force descriptor for the Kramer's force-dependent unbinding of the hand
    activity = nucleate
    nucleate = 2, microtubule, ( fiber_length= 1.5 )
    %Defines that this hand will generate a single fiber of type "microtubule" with an initial length of 1.5 μm.
    display = ( size=2; color= red; )    %Sets display parameters for visualization
}

set hand cargoD
{
    binding_rate = 2                  %s-1; frequency of the hand binding a nearby fiber
    binding_range = 0.1               %μm; defines minimal distance for hand to be able to bind a fiber
    unbinding_rate = 0                %s-1; frequency of the hand letting go of a fiber if bound
    unbinding_force = 6                %pN; force descriptor for the Kramer's force-dependent unbinding of the hand
    binding_key = 2                    %Numeric designator that defines which hands and couples can interact/bind
    display = (size=2; color=0xFF000001) %Sets display parameters for visualization (color is in HEX)
}

set hand dynein
{
    binding_rate = 0.5                %s-1; frequency of the hand binding a nearby fiber
    binding_range = 0.1               %μm; defines minimal distance for hand to be able to bind a fiber
    unbinding_rate = 0.1              %s-1; frequency of the hand letting go of a fiber if bound
    unbinding_force = 8                %pN; force descriptor for the Kramer's force-dependent unbinding of the hand
    binding_key = 1                    %Numeric designator that defines which hands and couples can interact/bind
    activity = move                    %Sets activity so that this hand can motor on fibers
    max_speed = -0.1                  %μm/s; defines maximum translocation (towards the minus end) with no load
    stall_force = 6                   %pN; defines force-load at which motor will stall on a fiber
    binding_key = 1                    %Numeric designator that defines which hands and couples can interact/bind
    display = (size=2; color=0xFF000001) %Sets display parameters for visualization (color is in HEX)
}

%%%%%%%%%%%%%%%%%%%%%%%%%%%%%%%%%%%%%%%%%%%%%%%%%%%%%%%%%%%%%%%%%%%%%%%%SINGLES%%%%%%%%%%%%%%%%%%%%%%%%%%%%%%%%%%%%%%%%%%%%%%%%%%%%%%%%%%%%%%%%%%%%%%%%

set single spindleNucleator
{
    hand = nucleator2                 %Defines the hand on a simple agent
    stiffness = 100                   %pN/μm; used to calculate strain and deformation of single under force
}

set single corticalNucleator
{
    hand = nucleator                  %Defines the hand on a simple agent
    activity = fixed                   %Sets this single to be fixed in space (does not move with Brownian)
    stiffness = 1000                  %pN/μm; used to calculate strain and deformation of single under force
}

set single corticalGlue
{
    hand = concrete                   %Defines the hand on a simple agent
    confine = surface                  %Sets this single to be fixed on the edge of the 2D space
    stiffness = 500                   %pN/μm; used to calculate strain and deformation of single under force
}

```



%%%%%%%%%%%%%%%%%%%%%%%%%%%%%%%%%%%%%%%%%%%%%%%%%%%%%%%%%%%%%%%%%%%%%%%%% **COUPLES** %%%%%%%%%%%%%%%%%%%%%%%%%%%%%%%%%%%%%%%%%%%%%%%%%%%%%%%%%%%%%%%%%%%%%%%%%%

set couple Dynein

```
{
  hand1 = cargoD           %Defines the hand on an agent that can bind two fibers
  hand2 = dynein           %Defines the hand on an agent that can bind two fibers
  stiffness = 100          %pN/μm; used to calculate strain and deformation of couple under force
  fast_diffusion = 1       %Boolean; if enabled unbound couples are not given explicit positions but are presumed
                           %to diffuse so quickly they can interact with a random fiber at any point.
  length = 0.03            %μm; defines the length of the linker between two hands
  activity = crosslink      %Sets couple to bind fibers with both hands and transmit forces between them
}
```

%%%%%%%%%%%%%%%%%%%%%%%%%%%%%%%%%%%%%%%%%%%%%%%%%%%%%%%%%%%%%%%%%%%%%%%%% **SOLIDS** %%%%%%%%%%%%%%%%%%%%%%%%%%%%%%%%%%%%%%%%%%%%%%%%%%%%%%%%%%%%%%%%%%%%%%%%%%

set solid spindle

```
{
  confine = all_inside, 100 %Sets solid to be confined inside the space with an energy cost of 100 for violations
  steric = 1              %Boolean; spindle solids cannot be crossed by other steric components
  display = { style=6 }   % Sets display parameters for visualization
}
```

new space cell

%%%%%%%%%%%%%%%%%%%%%%%%%%%%%%%%%%%%%%%%%%%%%%%%%%%%%%%%%%%%%%%%%%%%%%%%% **RUN** %%%%%%%%%%%%%%%%%%%%%%%%%%%%%%%%%%%%%%%%%%%%%%%%%%%%%%%%%%%%%%%%%%%%%%%%%%

new 1 solid spindle

%Generates a solid consisting of many points, some of which are beads and some of  
%which are nucleators that generate spindle pole microtubules. This code generates one  
%specific spindle geometry. Several others were also run to compare different spindles.  
%first three numbers define placement (X,Y,Z) relative to the central coordinates of the  
%solid at any given timepoint.

```
{
  nb_points = 34           %Sets number of points that make up the solid
  point0 = 0 1.2 0, 0.6    %Defines a bead of radius 0.6 μm
  point1 = 0 -1.2 0, 0.6   %Defines a bead of radius 0.6 μm
  point2 = 0.6 0 0, 1.4    %Defines a bead of radius 1.4 μm
  point3 = -0.6 0 0, 1.4   %Defines a bead of radius 1.4 μm
  point4 = 1.625 1.06 0 , 0, spindleNucleator %Defines a nucleator on the spindle pole
  point5 = 1.393 1.174 0 , 0, spindleNucleator %Defines a nucleator on the spindle pole
  point6 = 1.161 1.289 0 , 0, spindleNucleator %Defines a nucleator on the spindle pole
  point7 = 0.929 1.403 0 , 0, spindleNucleator %Defines a nucleator on the spindle pole
  point8 = 0.696 1.517 0 , 0, spindleNucleator %Defines a nucleator on the spindle pole
  point9 = 0.464 1.631 0 , 0, spindleNucleator %Defines a nucleator on the spindle pole
  point10 = 0.232 1.746 0 , 0, spindleNucleator %Defines a nucleator on the spindle pole
  point11 = 0 1.86 0 , 0, spindleNucleator %Defines a nucleator on the spindle pole
  point12 = -0.232 1.746 0 , 0, spindleNucleator %Defines a nucleator on the spindle pole
  point13 = -0.464 1.631 0 , 0, spindleNucleator %Defines a nucleator on the spindle pole
  point14 = -0.696 1.517 0 , 0, spindleNucleator %Defines a nucleator on the spindle pole
  point15 = -0.929 1.403 0 , 0, spindleNucleator %Defines a nucleator on the spindle pole
  point16 = -1.161 1.289 0 , 0, spindleNucleator %Defines a nucleator on the spindle pole
  point17 = -1.393 1.174 0 , 0, spindleNucleator %Defines a nucleator on the spindle pole
  point18 = -1.625 1.06 0 , 0, spindleNucleator %Defines a nucleator on the spindle pole
  %%%%%%%%%%%%%%%%%%%%%%%%%%%%%%%%%%%%%%%%%%%%%%%%%%%%%%%%%%%%%%%%%%%%%%%%%%
  point19 = 1.625 -1.06 0 , 0, spindleNucleator %Defines a nucleator on the spindle pole
  point20 = 1.393 -1.174 0 , 0, spindleNucleator %Defines a nucleator on the spindle pole
  point21 = 1.161 -1.289 0 , 0, spindleNucleator %Defines a nucleator on the spindle pole
  point22 = 0.929 -1.403 0 , 0, spindleNucleator %Defines a nucleator on the spindle pole
  point23 = 0.696 -1.517 0 , 0, spindleNucleator %Defines a nucleator on the spindle pole
  point24 = 0.464 -1.631 0 , 0, spindleNucleator %Defines a nucleator on the spindle pole
  point25 = 0.232 -1.746 0 , 0, spindleNucleator %Defines a nucleator on the spindle pole
  point26 = 0 -1.86 0 , 0, spindleNucleator %Defines a nucleator on the spindle pole
  point27 = -0.232 -1.746 0 , 0, spindleNucleator %Defines a nucleator on the spindle pole
}
```



|                                                     |                                                                |
|-----------------------------------------------------|----------------------------------------------------------------|
| point28 = -0.464 -1.631 0 , 0, spindleNucleator     | %Defines a nucleator on the spindle pole                       |
| point29 = -0.696 -1.517 0 , 0, spindleNucleator     | %Defines a nucleator on the spindle pole                       |
| point30 = -0.929 -1.403 0 , 0, spindleNucleator     | %Defines a nucleator on the spindle pole                       |
| point31 = -1.161 -1.289 0 , 0, spindleNucleator     | %Defines a nucleator on the spindle pole                       |
| point32 = -1.393 -1.174 0 , 0, spindleNucleator     | %Defines a nucleator on the spindle pole                       |
| point33 = -1.625 -1.06 0 , 0, spindleNucleator      | %Defines a nucleator on the spindle pole                       |
| position = 16.8 0 0 at 0 0                          | %Places the solid in absolute space                            |
| orientation = 1 0 0                                 | %Aligns the spindle solid to the X axis                        |
| }                                                   |                                                                |
| new 2000 couple Dynein                              | %Places 2000 couples randomly in the space                     |
| new 100 single corticalGlue                         | %Places 100 singles                                            |
| {                                                   |                                                                |
| position = rectangle 2 4 at 16.5 0                  | %Places these singles in a rectangle centered at 16.5 in X     |
| }                                                   |                                                                |
| new 140 single corticalNucleator                    | %Places 140 singles                                            |
| {                                                   |                                                                |
| position = arc 30 2.0 at 19.96 0                    | Places them in an arc at 19.96 in X with radius 30 and width 2 |
| }                                                   |                                                                |
| run simul *                                         | %Run the simulation                                            |
| {                                                   |                                                                |
| nb_steps = 3000                                     | %Number of calculated timepoints                               |
| nb_frames = 3                                       | %Number of frames generated for visualization                  |
| }                                                   |                                                                |
| change single corticalNucleator {activity = fixed;} | %Changes single so that they cannot move anymore               |
| run simul *                                         | %Run the simulation                                            |
| {                                                   |                                                                |
| nb_steps = 300000                                   | %Number of calculated timepoints                               |
| nb_frames = 300                                     | %Number of frames generated for visualization                  |
| }                                                   |                                                                |

## Movies

For all movies: Red dots represent cytoplasmic dynein molecules that associate randomly with astral or cortical microtubules, motor to the minus end, and dissociate with a rate constant that increases with applied force. Pulling toward the cortex occurs transiently when a dynein contacts both a cortical microtubule and an astral microtubule. After the first frame, only dynein molecules engaged with a microtubule are displayed. Astral microtubules emanate from nucleators arranged to mimic the localization of dynein/LIN-5 on control (flat) or *mei-2(ct98)* (pointed) poles. Green dots represent nucleation sites for short cortical microtubules. Purple dots represent a “cortical glue” that resists detachment once close contact between the pole and cortex is achieved. All spindles start at a fixed distance from the cortex and perfectly parallel to the cortex.

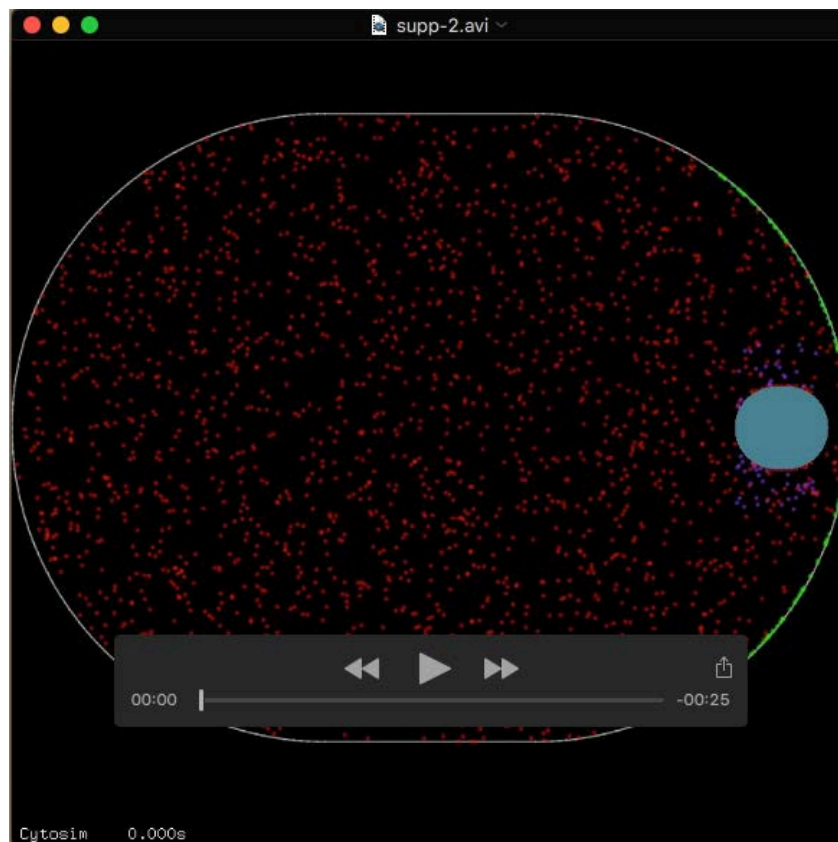

Movie 1. Simulation of rotation of a short (0.9 axial ratio) spindle with flattened poles and short astral microtubules. This shape mimics control spindles midway through rotation. Astral microtubules are short due to a polymerization rate of  $0.06 \mu\text{m/s}$ .

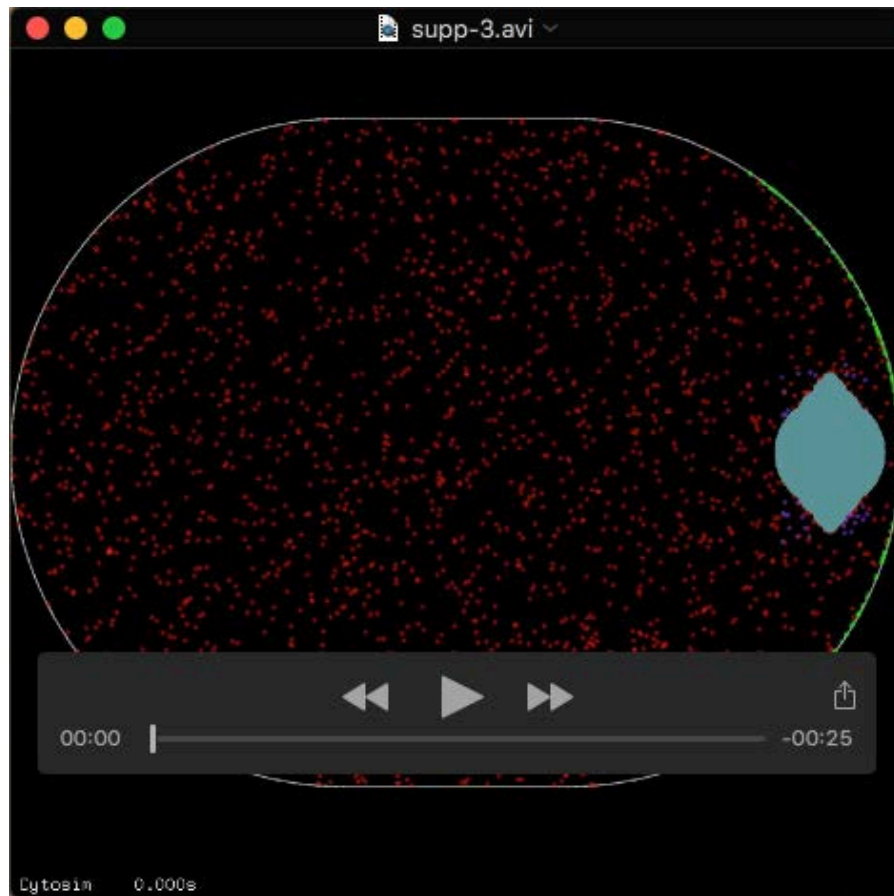

Movie 2. Simulation of rotation of a long (1.5 axial ratio) spindle with pointed poles and short astral microtubules. This shape mimics the shape of the shortest mei-2(ct98) spindles that rotate partially to a diagonal angle relative to the cortex. Astral microtubules are short due to a polymerization rate of  $0.06 \mu\text{m/s}$ .

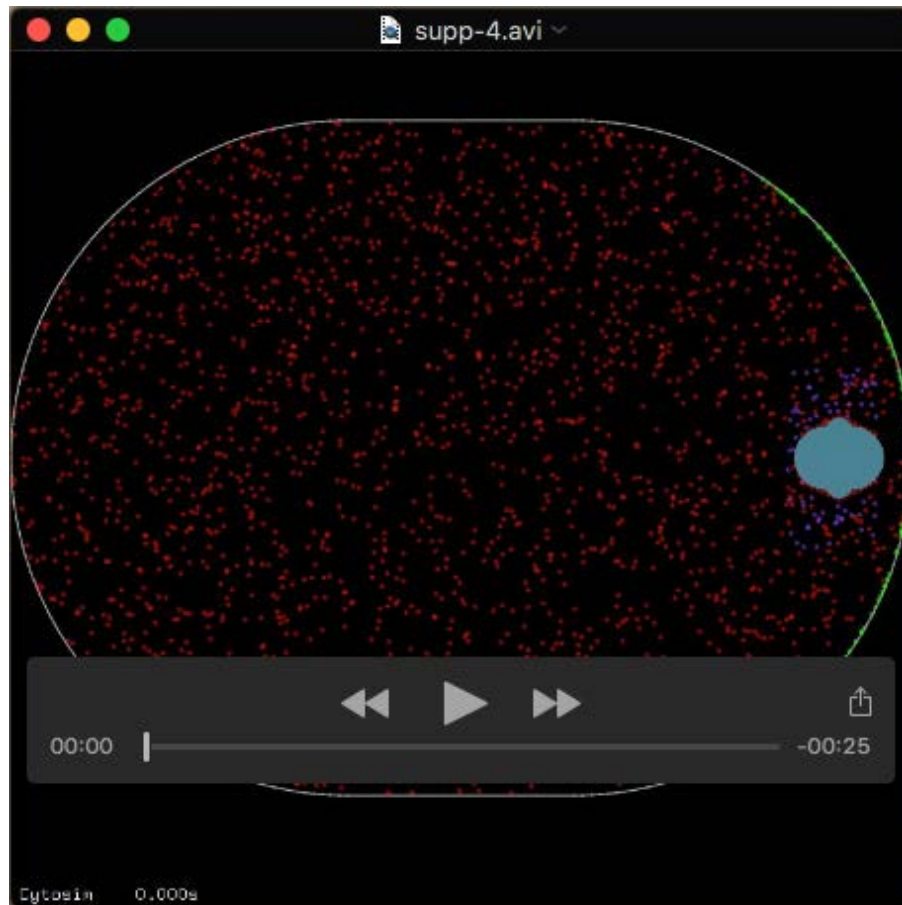

Movie 3. Simulation of rotation of a short (0.9 axial ratio) spindle with pointed poles and short astral microtubules. This spindle has the axial ratio of a control spindle and pointed poles like a *mei-2(ct98)* spindle. Astral microtubules are short due to a polymerization rate of 0.06  $\mu\text{m/s}$ .

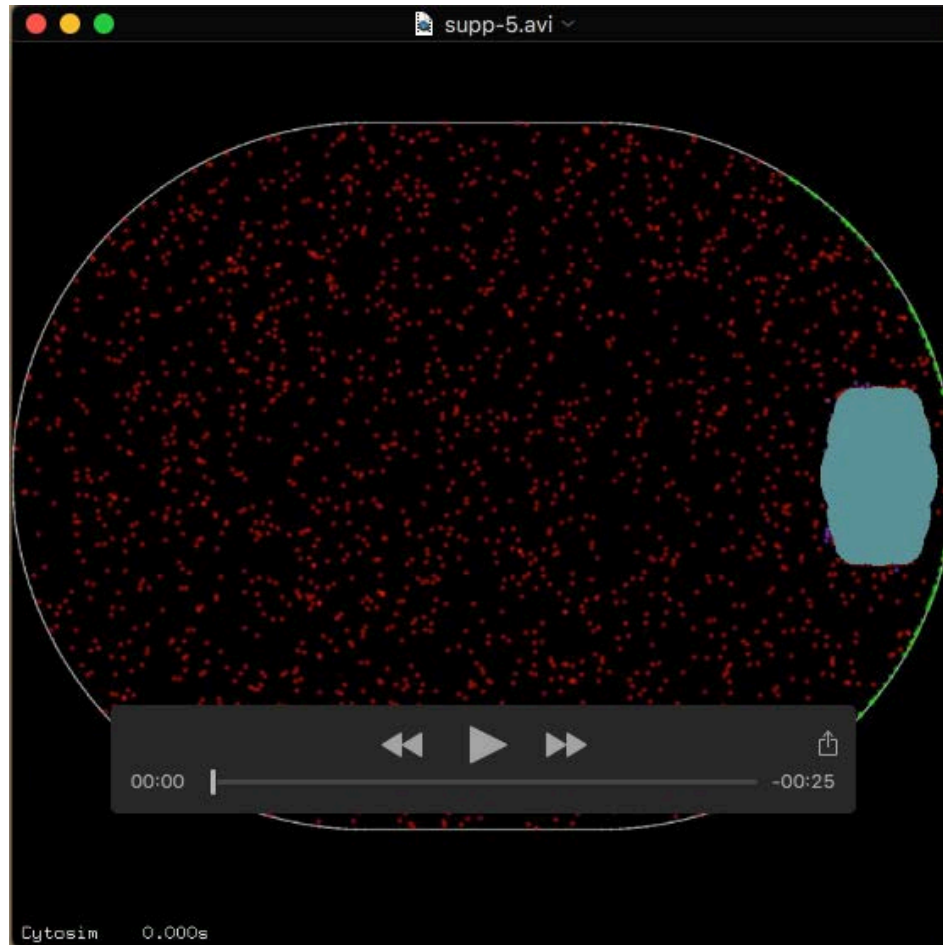

Movie 4. Simulation of rotation of a long (1.5 axial ratio) spindle with flattened poles and short astral microtubules. This spindle has the axial ratio of the shortest *mei-2(ct98)* spindles that rotate partially to a diagonal angle relative to the cortex but with poles shaped like those of a control spindle. This shape is also similar to that of *knl-1,3(kd)* spindles that partially rotate or fail to rotate. Astral microtubules are short due to a polymerization rate of 0.06  $\mu\text{m/s}$ .

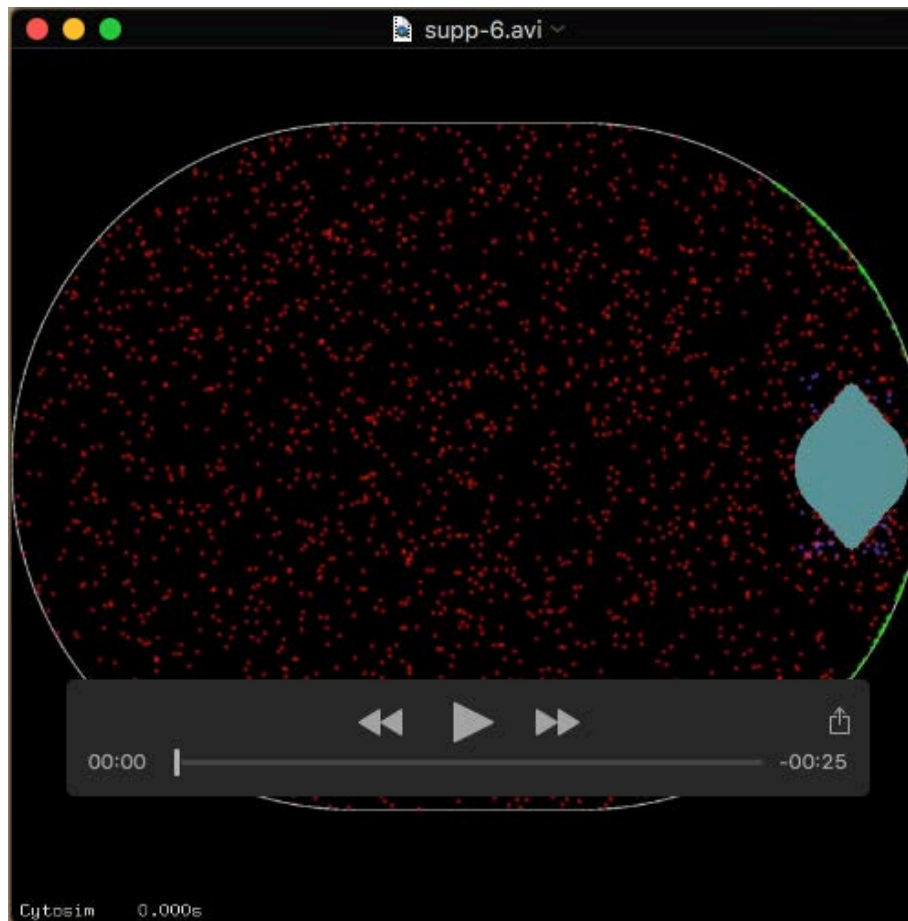

Movie 5. Simulation of rotation of a long (1.5 axial ratio) spindle with pointed poles and long astral microtubules. This shape mimics the shape of the shortest *mei-2(ct98)* spindles that rotate partially to a diagonal angle relative to the cortex. Astral microtubules are long due to a polymerization rate of  $0.18 \mu\text{m/s}$ .



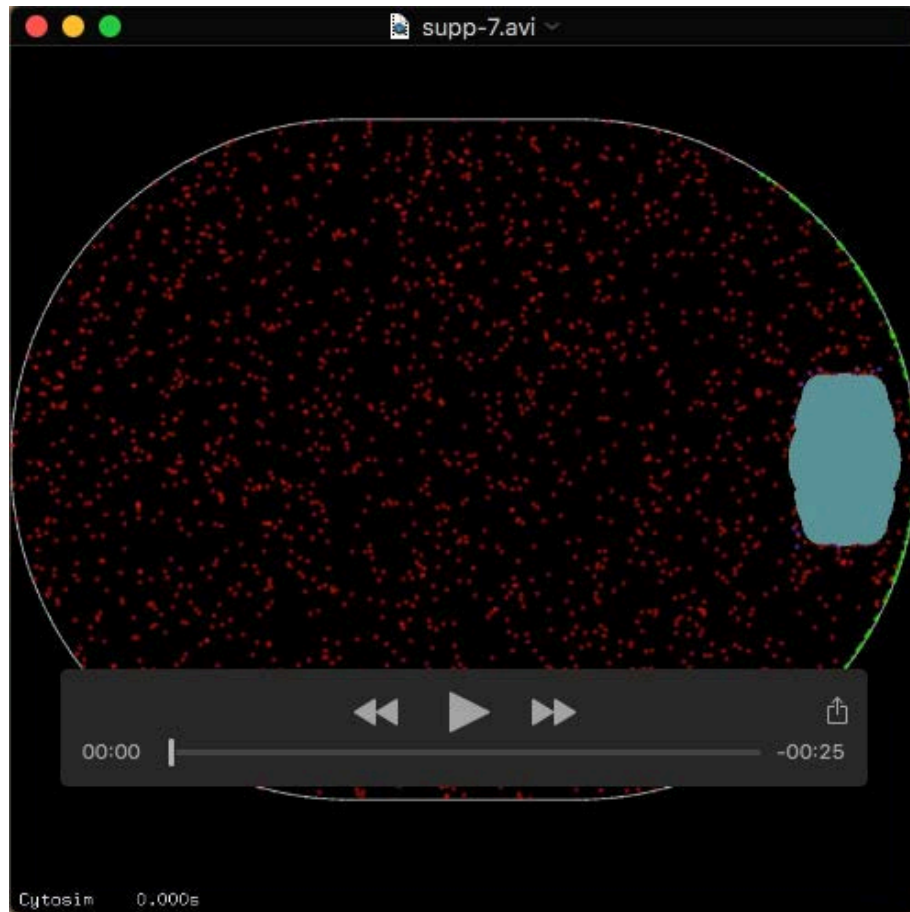

Movie 6. Simulation of rotation of a long (1.5 axial ratio) spindle with flattened poles and long astral microtubules. This spindle has the axial ratio of the shortest *mei-2(ct98)* spindles that rotate partially to a diagonal angle relative to the cortex but with poles shaped like those of a control spindle. This shape is also similar to that of *knl-1,3(kd)* spindles that partially rotate or fail to rotate. Astral microtubules are long due to a polymerization rate of 0.18  $\mu\text{m/s}$ .

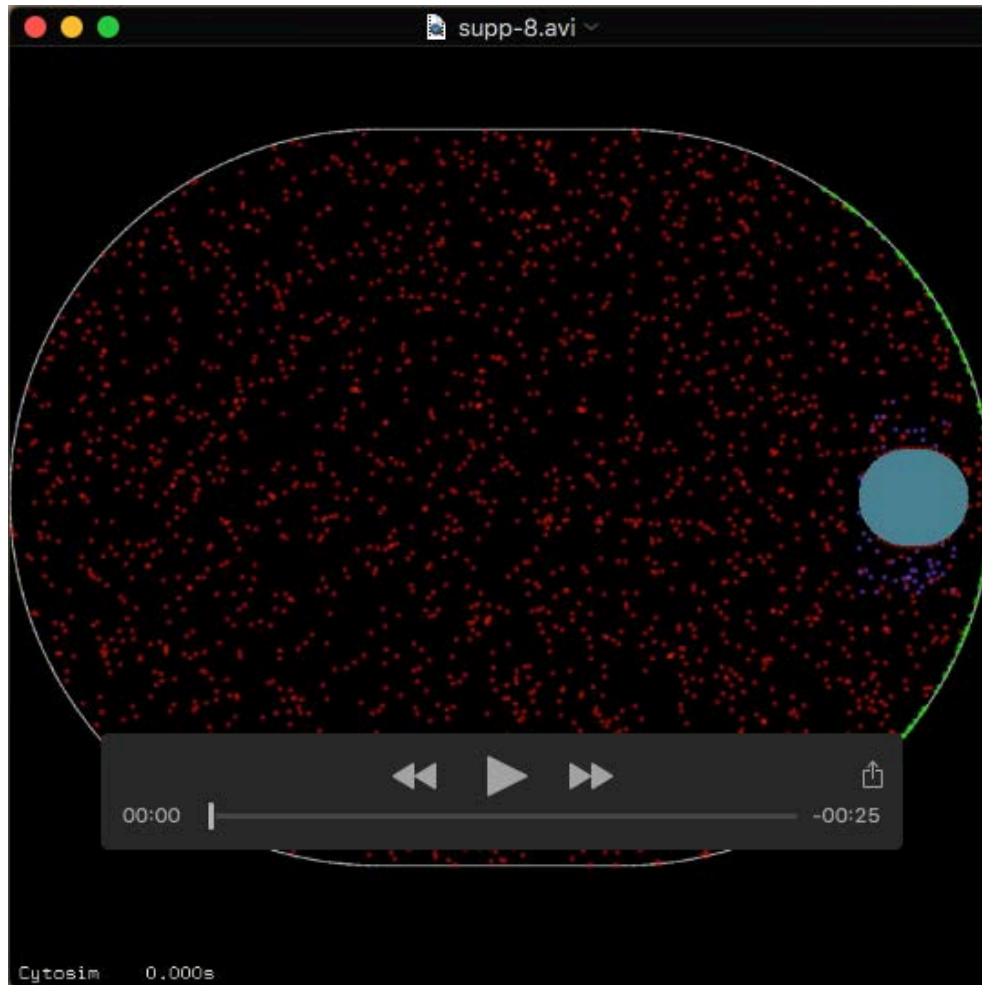

Movie 7. Simulation of rotation of a short (0.9 axial ratio) spindle with flattened poles and long astral microtubules. This shape mimics control spindles midway through rotation. Astral microtubules are long due to a polymerization rate of  $0.18 \mu\text{m/s}$ .

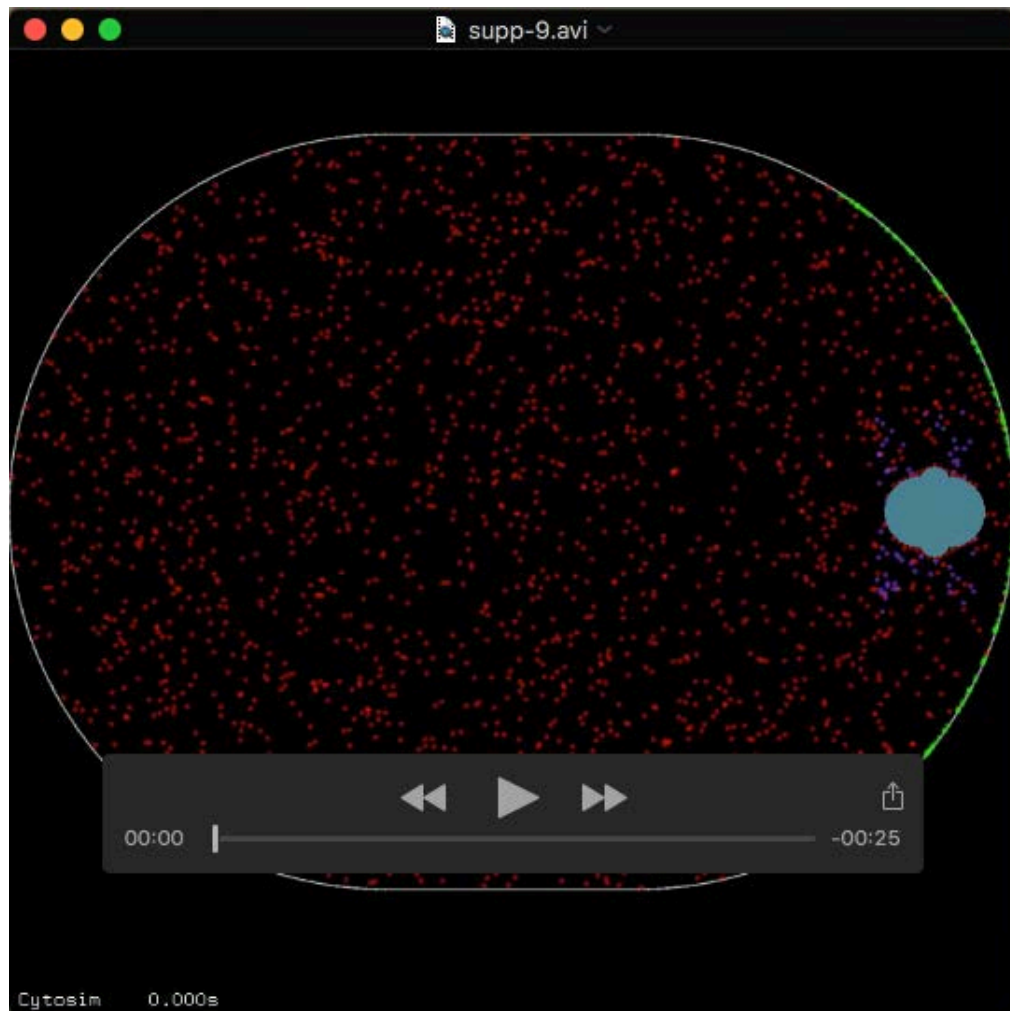

Movie 8. Simulation of rotation of a short (0.9 axial ratio) spindle with pointed poles and long astral microtubules. This spindle has the axial ratio of a control spindle and pointed poles like a *mei-2(ct98)* spindle. Astral microtubules are long due to a polymerization rate of 0.18  $\mu\text{m/s}$ .
